# Supplementary material
Source: Research Square preprint supplement (doi:10.21203/rs.3.rs-9868577/v1)
Supplement: Supplementary file 1 [file de1fffa4108f8908082fb6ab.docx]

# Supplementary Materials

**Manuscript:**

Candidate Gene Polymorphisms Associated with Newcastle Disease Outcomes in Chickens: A Systematic Literature Review

**Authors:** Nsiyapnze Katte Yato Katte, Shey Ndogmi Yoniwo, Hako Touko Blaise Arnaud, Julius Awah-Ndukum

## Supplementary Material 1. PRISMA 2020 Checklist

This checklist was prepared according to the PRISMA 2020 guidelines for systematic reviews without meta-analysis. The review synthesised evidence on genetic determinants of Newcastle disease virus resistance in chickens, including candidate gene association studies, GWAS, QTL mapping, and functional validation studies.

| **Section and Topic** | **Item #** | **Checklist item** | **Location where item is reported** |
| --- | --- | --- | --- |
| **TITLE** | | |  |
| Title | 1 | Identify the report as a systematic review. | Title page: “Candidate Gene Polymorphisms Associated with Newcastle Disease Outcomes in Chickens: A Systematic Literature Review. |
| **ABSTRACT** | | |  |
| Abstract | 2 | See the PRISMA 2020 for Abstracts checklist. | Abstract: structured under Background, Methods, Results, and Conclusions |
| **INTRODUCTION** | | |  |
| Rationale | 3 | Describe the rationale for the review in the context of existing knowledge. | Section 1.1 Rationale. The introduction contextualises ND burden, vaccination limitations, host genetic resistance, Mx, MHC, ROBO2, GWAS/QTL loci, and the need for systematic synthesis. |
| Objectives | 4 | Provide an explicit statement of the objective(s) or question(s) the review addresses. | Section 1.2 Objectives |
| **METHODS** | | |  |
| Eligibility criteria | 5 | Specify the inclusion and exclusion criteria for the review and how studies were grouped for the syntheses. | Section 2.4 Eligibility Criteria; Table 1 PICOS framework Study grouping is also described in Section 2.8 Data Synthesis and Section 3.2 Study Characteristics |
| Information sources | 6 | Specify all databases, registers, websites, organisations, reference lists and other sources searched or consulted to identify studies. Specify the date when each source was last searched or consulted. | Section 2.3 Search Strategy; Supplementary Material 3. The manuscript states that PubMed, Scopus, Web of Science, and Google Scholar were searched for records published between January 200 and May 2026 |
| Search strategy | 7 | Present the full search strategies for all databases, registers and websites, including any filters and limits used. | Supplementary Material 3: Full Database Search Strategies. Search strings are provided for PubMed, Scopus, Web of Science and Google Scholar |
| Selection process | 8 | Specify the methods used to decide whether a study met the inclusion criteria of the review, including how many reviewers screened each record and each report retrieved, whether they worked independently, and if applicable, details of automation tools used in the process. | Section 2.5 Screening process. It states that two reviewers screened independently, with disagreements resolved by consensus or adjudication |
| Data collection process | 9 | Specify the methods used to collect data from reports, including how many reviewers collected data from each report, whether they worked independently, any processes for obtaining or confirming data from study investigators, and if applicable, details of automation tools used in the process. | Section 2.6 Data extraction. It states that two reviewers extracted the data independently using a standardised template and resolved discrepancies by discussion/referral. |
| Data items | 10a | List and define all outcomes for which data were sought. Specify whether all results that were compatible with each outcome domain in each study were sought (e.g. for all measures, time points, analyses), and if not, the methods used to decide which results to collect. | Table 1 PICOS framework, Outcome row; section 2.6 Data Extraction; Table 2 Characteristics of included studies. Outcomes include antibody titres, viral load/titre, viral shedding, clinical scores, survival/mortality, T-cell responses, and post-infection body weight |
| 10b | List and define all other variables for which data were sought (e.g. participant and intervention characteristics, funding sources). Describe any assumptions made about any missing or unclear information. | Section 2.6 Data extraction; Table 2 Characteristics of included studies. Extracted variables include target gene, polymorphism/marker, study design, chicken population/breed, ND outcome, key findings, and sample size. |
| Study risk of bias assessment | 11 | Specify the methods used to assess risk of bias in the included studies, including details of the tool(s) used, how many reviewers assessed each study and whether they worked independently, and if applicable, details of automation tools used in the process. | Section 2.7 Quality Assessment; Supplementary Material 2 Structured Critical Appraisal. The appraisal uses ten domains adapted from Munn et al. (2014) and supplemented with genetic epidemiology/livestock genomics domains. |
| Effect measures | 12 | Specify for each outcome the effect measure(s) (e.g. risk ratio, mean difference) used in the synthesis or presentation of results. | Section 2.6 Data Extraction; Section 2.8 Data synthesis; Table 2; Sections 3.3.1-3.3.4. The review did not use a single common effect measure because meta-analysis was not performed; effect sizes were extracted where reported, while most findings were synthesised narratively. |
| Synthesis methods | 13a | Describe the processes used to decide which studies were eligible for each synthesis (e.g. tabulating the study intervention characteristics and comparing against the planned groups for each synthesis (item #5)). | Section 2.4 Eligibility criteria, 2.8 Data Synthesis, and 3.3 Synthesis of Evidence. Studies were grouped by candidate gene category: Mx, MHC, ROBO2 and GWAS/QTL/Other candidate genes. |
| 13b | Describe any methods required to prepare the data for presentation or synthesis, such as handling of missing summary statistics or data conversions. | Section 2.8 Data Synthesis; Table 2. No quantitative data transformation was carried out because formal meta-analysis was not performed. Missing or unavailable information is reported as “NR” in Table 2 |
| 13c | Describe any methods used to tabulate or visually display results of individual studies and syntheses. | Table 2 Characteristics of included studies; Figure 1 PRISMA flow diagram; Figure 2 Annual distribution of included studies; Supplementary Material 2 structured critical appraisal. |
| 13d | Describe any methods used to synthesize results and provide a rationale for the choice(s). If meta-analysis was performed, describe the model(s), method(s) to identify the presence and extent of statistical heterogeneity, and software package(s) used. | Section 2.8 Data synthesis; Sections 3.3.1-3.3.4. The manuscript explains that heterogeneity precluded meta-analysis and that results were synthesised narratively by gene category and cross-study pattern. |
| 13e | Describe any methods used to explore possible causes of heterogeneity among study results (e.g. subgroup analysis, meta-regression). | Section 3.3.4 Patterns Across Studies; Section 4.5 Population Specificity and marker transferability; Section 4.7 Methodological limitations. These sections discuss population specificity, phenotype homogeneity, study-design heterogeneity, GXE interactions, and differences in outcome measures. |
| 13f | Describe any sensitivity analyses conducted to assess robustness of the synthesized results. | Section 2.8 Data synthesis. The manuscript states that no sensitivity analyses were performed because formal meta-analysis was not undertaken. |
| Reporting bias assessment | 14 | Describe any methods used to assess risk of bias due to missing results in a synthesis (arising from reporting biases). | Section 4.7 Methodological limitations of the evidence base. The manuscript discusses possible publication bias/selective reporting and explains that a formal funnel-plot assessment was not feasible due to the small number of studies per gene category. |
| Certainty assessment | 15 | Describe any methods used to assess certainty (or confidence) in the body of evidence for an outcome. | Section 2.7 Quality Assessment; Section 3.4 Quality Assessment Results; Supplementary Material 2. The review does not perform a formal GRADE certainty assessment; instead, it reports methodological robustness using structured appraisal domains |
| **RESULTS** | | |  |
| Study selection | 16a | Describe the results of the search and selection process, from the number of records identified in the search to the number of studies included in the review, ideally using a flow diagram. | Section 3.1 Study Selection; Figure 1 PRISMA Flow Diagram. The manuscript reports 701 records identified, 220 duplicates removed, 481 screened, 457 excluded, 24 full texts assessed, five excluded, and 19 included. |
| 16b | Cite studies that might appear to meet the inclusion criteria, but which were excluded, and explain why they were excluded. | Section 3.1 Study Selection; Figure 1 PRISMA Flow Diagram. Reasons are reported for full-text exclusions: insufficient genotype-phenotype linkage and transcriptomics without polymorphism data. |
| Study characteristics | 17 | Cite each included study and present its characteristics. | Section 3.2 Study Characteristics; Table 2 Characteristics of included studies. |
| Risk of bias in studies | 18 | Present assessments of risk of bias for each included study. | Section 3.4 Quality Assessment results; Supplementary Material 2 Structured Critical Appraisal. The manuscript summarises methodological robustness as high, moderate or low. |
| Results of individual studies | 19 | For all outcomes, present, for each study: (a) summary statistics for each group (where appropriate) and (b) an effect estimate and its precision (e.g. confidence/credible interval), ideally using structured tables or plots. | Table 2 Characteristics of included studies; Sections 3.3.1-3.3.3. Study-level results are presented narratively for Mx, MHC, ROBO2, and GWAS/QTL-derived loci. Effect estimates and precision are not uniformly available |
| Results of syntheses | 20a | For each synthesis, briefly summarise the characteristics and risk of bias among contributing studies. | Sections 3.3.1-3.3.4 and Section 3.4. Each synthesis describes the contributing studies by gene category, and the methodological robustness gradient is summarised in section 3.4. |
| 20b | Present results of all statistical syntheses conducted. If meta-analysis was done, present for each the summary estimate and its precision (e.g. confidence/credible interval) and measures of statistical heterogeneity. If comparing groups, describe the direction of the effect. | Not applicable |
| 20c | Present results of all investigations of possible causes of heterogeneity among study results. | Section 3.3.4 Patterns Across Studies; Sections 4.5 and 4.7. These sections discuss consistency, population specificity, polygenic architecture, pleiotropy, GXE interaction, and phenotyping heterogeneity |
| 20d | Present results of all sensitivity analyses conducted to assess the robustness of the synthesized results. | Not applicable. No sensitivity analyses were conducted because no formal meta-analysis was performed. |
| Reporting biases | 21 | Present assessments of risk of bias due to missing results (arising from reporting biases) for each synthesis assessed. | Section 4.7 Methodological limitations. The manuscript discusses publication bias and selective reporting but does not present a formal reporting-bias test. |
| Certainty of evidence | 22 | Present assessments of certainty (or confidence) in the body of evidence for each outcome assessed. | Section 3.4 Quality Assessment Results; Supplementary Material 2. The manuscript reports methodological robustness, rather than formal certainty of evidence |
| **DISCUSSION** | | |  |
| Discussion | 23a | Provide a general interpretation of the results in the context of other evidence. | Section 4.1 Principal findings and evidence hierarchy; Section 4.9 Synthesis. The discussion interprets the evidence as strongest for MHC-linked markers, moderate for reported Mx polymorphisms, and preliminary for ROBO2/GWAS-QTL-loci |
| 23b | Discuss any limitations of the evidence included in the review. | Section 4.7 Methodological limitations of the evidence base. |
| 23c | Discuss any limitations of the review processes used. | Section 4.7 Methodological limitations. This section discusses the lack of meta-analysis, publication bias, selective reporting, limited effect-size reporting, and the inability to formally assess publication bias due to small number of studies. |
| 23d | Discuss implications of the results for practice, policy, and future research. | Sections 4.6 Breeding Implications. 4.8 Future research priorities and 4.9 Synthesis. These sections discuss marker-assisted selection, genomic selection, population-specific validation, multi-trait selection, functional validation, harmonised phenotyping, and implementation studies |
| **OTHER INFORMATION** | | |  |
| Registration and protocol | 24a | Provide registration information for the review, including register name and registration number, or state that the review was not registered. | Section 2.1 Protocol and registration. The manuscript states that the review protocol was registered with the Systematic Reviews for Animals & Food (SYREAF) registry in May 2026. |
| 24b | Indicate where the review protocol can be accessed, or state that a protocol was not prepared. | Section 2.1 Protocol and registration. The manuscript states that the protocol is from the corresponding author upon request. |
| 24c | Describe and explain any amendments to information provided at registration or in the protocol. | Section 2.1 Protocol and registration. The manuscript states that no amendments to the protocol were made after registration. |
| Support | 25 | Describe sources of financial or non-financial support for the review, and the role of the funders or sponsors in the review. | Funding statement, end matter. The manuscript states that no specific grant was received from any funding agency in the public, commercial or not-for-profit sectors |
| Competing interests | 26 | Declare any competing interests of review authors. | Competing interests statement, end matter. The authors declare no competing interests. |
| Availability of data, code and other materials | 27 | Report which of the following are publicly available and where they can be found: template data collection forms; data extracted from included studies; data used for all analyses; analytic code; any other materials used in the review. | Data availability statement, end matter; supplementary materials. The manuscript states that the original contributions are contained within the article and supplementary material and that additional questions can be addressed to the corresponding author |

## Supplementary Material 2. Structured Critical Appraisal

A structured critical appraisal framework adapted from Munn et al. (2014) and supplemented with genetic epidemiology and livestock genomics domains was used to evaluate methodological quality.

1. **Domain 1:** Representativeness of the study population

Were the chicken populations clearly defined? Were breed, line, ecotype, or genetic background specified? Was the sampling method appropriate to minimise selection bias (e.g., random sampling, stratification by genotype)? Were commercial, indigenous, and experimental lines appropriately characterised?

1. **Domain 2:** Sample size and statistical power

Was the sample size justified by power calculations or minimum detectable effect size? Were there at least 100 individuals for candidate gene studies and >500 for GWAS? Were rare allele frequencies (<0.2) adequately powered? Was the 'winner's curse' phenomenon acknowledged?

1. **Domain 3:** Genotyping methodology and validation

Were genotyping methods clearly described (PCR-SSCP, Sanger sequencing, SNP arrays)? Was marker validation performed (e.g., Hardy–Weinberg equilibrium testing, reproducibility checks)? Were allele frequencies reported? Was the linkage disequilibrium structure characterised for the population?

1. **Domain 4:** Phenotype measurement standardisation

Were NDV outcomes measured using validated assays (HI, ELISA, qPCR)? Were challenge protocols standardised (strain, dose, route, time points)? Were antibody titres measured at consistent post-vaccination intervals? Were clinical scores and mortality recorded with predefined criteria?

1. **Domain 5:** Genotype–phenotype association and statistical analysis

Was the statistical approach appropriate for the design? Were appropriate models used (linear regression, mixed models, Cox proportional hazards)? Was correction for multiple testing applied (Bonferroni, FDR, permutation for GWAS; per-gene correction for candidate studies)? Were confounders controlled (age, sex, batch, MHC background)?

1. **Domain 6:** Population stratification and relatedness

Was population structure assessed and accounted for? Were principal component analysis (PCA), genomic relationship matrices, or pedigree information used in GWAS? Was cryptic relatedness addressed? Were inbred lines appropriately handled?

1. **Domain 7:** Functional and mechanistic validation

Was functional evidence provided to support causality (e.g., gene expression, protein characterisation, CRISPR/Cas9 knockout, overexpression)? Were mechanistic pathways elucidated (e.g., Mx GTPase activity, MHC peptide binding predictions)? Was the distinction between correlation and causation maintained?

1. **Domain 8:** Reproducibility and replication

Were findings replicated in independent populations or cohorts? Were results consistent across breeds, geographic regions, or experimental conditions? Was between-study heterogeneity quantified or discussed? Were failed replications or null results reported?

1. **Domain 9:** Reporting completeness and transparency

Were all pre-specified outcomes reported? Was selective reporting evident? Were effect sizes (variance explained, odds ratios, genotypic means) provided with precision estimates? Was the flow of participants/studies documented? Were deviations from the protocol explained?

1. **Domain 10:** External validity and practical applicability

Were results generalisable to target populations (e.g., smallholder chickens in Africa/Asia, commercial layers)? Were gene-by-environment interactions considered (e.g., heat stress, co-infection)? Were implications for marker-assisted selection or genomic selection discussed with realistic effect sizes?

Legend: ✓ = adequately addressed; ✗ = not adequately addressed; ? = unclear/not reported; N/A = not applicable.

| **Study** | **Gene(s)** | **Design** | **D1** | **D2** | **D3** | **D4** | **D5** | **D6** | **D7** | **D8** | **D9** | **D10** | **Overall Rating** |
| --- | --- | --- | --- | --- | --- | --- | --- | --- | --- | --- | --- | --- | --- |
| Ahmed et al. (2007) | IFN-γ promoter | Controlled challenge + immune phenotyping | ✓ | ✗ | ✓ | ✓ | ✓ | N/A | ✗ | ✓ | ✗ | ✓ | Moderate |
| Lwelamira et al. (2008) | LEI0258 microsatellite | Candidate gene association | ✓ | ✗ | ✓ | ✓ | ✓ | N/A | ✗ | ✓ | ✓ | ✓ | Moderate |
| Liu et al. (2009) | MHC B-F gene | Candidate gene association | ✓ | ✗ | ✓ | ✓ | ✓ | N/A | ✗ | ✓ | ✗ | ✓ | Moderate |
| Norup et al. (2011) | MHC haplotypes; CD8α | Functional/controlled challenge | ✓ | ✗ | ✓ | ✓ | ✓ | N/A | ✓ | ✓ | ✗ | ✓ | Moderate |
| Hako Touko et al. (2013) | LEI0258 + QTL markers | QTL mapping | ✓ | ✗ | ✓ | ✓ | ✓ | N/A | ✗ | ✓ | ✓ | ✓ | Moderate |
| Li et al. (2013) | MHC B-LBII | Candidate gene association | ✓ | ✗ | ✓ | ✓ | ✓ | N/A | ✗ | ✓ | ✗ | ✓ | Moderate |
| Luo et al. (2013) | GWAS-identified ROBO1, ROBO2 | GWAS | ✓ | ✓ | ✓ | ✓ | ✓ | ✓ | N/A | ✓ | ✗ | ✓ | High |
| Pagala et al. (2013) | Mx gene (G/A SNP) | Candidate gene + challenge | ✓ | ✗ | ✓ | ✓ | ✓ | N/A | ✗ | ✓ | ✓ | ✓ | Moderate |
| Wang et al. (2014) | ROBO2 | Candidate gene association | ✓ | ✗ | ? | ✓ | ✗ | N/A | ✓ | ✗ | ✓ | ? | Low |
| Hassanane et al. (2018) | Mx gene (G/A SNP) | Candidate gene + functional | ✓ | ✗ | ✓ | ✓ | ✓ | ✓ | ✗ | ✓ | ✓ | ✓ | Moderate |
| Rowland et al. (2018a) | GWAS-identified loci | GWAS + challenge | ✓ | ✓ | ✓ | ✓ | ✓ | ✓ | N/A | ✓ | ✗ | ✓ | High |
| Rowland et al. (2018b) | TLR3, TLR7, Mx, MHC-B, etc. | Candidate gene + challenge | ✓ | ✓ | ✓ | ✓ | ✓ | N/A | ✗ | ✓ | ✗ | ✓ | Moderate |
| Dahiru (2018) | Mx gene | Candidate gene association | ✓ | ✗ | ✓ | ✓ | ✓ | N/A | ✗ | ✓ | ✓ | ✓ | Moderate |
| Saelao et al. (2019) | CAMK1d, CCDC3, TIRAP, ETS1, KIRREL3 | GWAS + QTL (heat stress) | ✓ | ✓ | ✓ | ✓ | ✓ | ✓ | N/A | ✓ | ✓ | ✓ | High |
| Mpenda et al. (2020) | LEI0258 marker | Candidate gene (embryo challenge) | ✓ | ✗ | ✓ | ✓ | ✓ | N/A | ✗ | ✓ | ✓ | ✓ | Moderate |
| Walugembe et al. (2020) | CHORDC1, VAV2, IL12B, DUSP1, IL17B, TIRAP, ETS1, KIRREL3 | GWAS + QTL + challenge | ✓ | ✓ | ✓ | ✓ | ✓ | ✓ | N/A | ✓ | ✓ | ✓ | High |
| Lestari et al. (2023) | MHC BLB2 | Candidate gene association | ✓ | ✗ | ✓ | ✓ | ✓ | N/A | ✗ | ✓ | ✗ | ✓ | Moderate |
| Wang et al. (2023) | Mx gene (CRISPR/Cas9 knockout) | Functional knockout | ✓ | N/A | ✓ | ✓ | N/A | ✓ | ✓ | ✓ | ✗ | ✓ | High |
| Girma et al. (2024) | FOXP2, CEP170B + additional SNPs | GWAS | ✓ | ✓ | ✓ | ✓ | ✓ | ✓ | N/A | ✓ | ✓ | ✓ | High |

Ratings were baes on information explicitly reported in the included articles. “Unclear” was assigned where a domain could not be verified from the published report

## Supplementary Material 3. Full Database Search Strategies

Search strategies were designed to identify studies investigating genetic determinants of Newcastle disease virus resistance in chickens, including candidate gene studies, GWAS, QTL mapping, and functional genomic investigations.

### PubMed

("Newcastle Disease"[Mesh] OR "Newcastle disease virus"[tiab] OR NDV[tiab])
AND
(chicken*[tiab] OR poultry[tiab] OR "Gallus gallus"[tiab])
AND
(genetic resistance[tiab] OR polymorphism*[tiab] OR SNP[tiab] OR genotype*[tiab]
OR haplotype*[tiab] OR "candidate gene"[tiab] OR GWAS[tiab]
OR "genome-wide association study"[tiab] OR QTL[tiab]
OR "quantitative trait loci"[tiab] OR genomic*[tiab])
AND
(Mx[tiab] OR MHC[tiab] OR LEI0258[tiab] OR ROBO2[tiab]
OR TIRAP[tiab] OR ETS1[tiab] OR CAMK1d[tiab] OR KIRREL3[tiab])

### Scopus

TITLE-ABS-KEY
(("Newcastle disease" OR "Newcastle disease virus" OR NDV)
AND (chicken* OR poultry OR "Gallus gallus")
AND ("genetic resistance" OR polymorphism* OR SNP OR genotype*
OR haplotype* OR "candidate gene" OR GWAS OR QTL OR genomic*)
AND (Mx OR MHC OR LEI0258 OR ROBO2 OR TIRAP OR ETS1
OR CAMK1d OR KIRREL3))

### Web of Science

TS=(("Newcastle disease" OR "Newcastle disease virus" OR NDV)
AND (chicken* OR poultry OR "Gallus gallus")
AND ("genetic resistance" OR polymorphism* OR SNP OR genotype*
OR haplotype* OR "candidate gene" OR GWAS OR QTL OR genomic*)
AND (Mx OR MHC OR LEI0258 OR ROBO2 OR TIRAP OR ETS1
OR CAMK1d OR KIRREL3))

### Google Scholar

"Newcastle disease virus" chicken polymorphism OR SNP OR GWAS OR QTL OR "candidate gene" Mx MHC LEI0258 ROBO2

All searches covered records published between January 2000 and May 2026 and were last run in May 2026. Reference lists of eligible articles were manually screened to identify additional studies.
